# Supplementary material for: Diabetes Mellitus Is a Strong Independent Negative Prognostic Factor in Patients with Brain Metastases Treated with Radiotherapy
Source: MDPI journal article supplement (doi:10.3390/cancers15194845), 2023-10-04
Supplement: s1 [file s1]

## Supplements

**Supplement Figure S1.** Uni- and multivariate cox regression analysis of survival of patients with (red)/without (blue) DM in patients with NSCLC

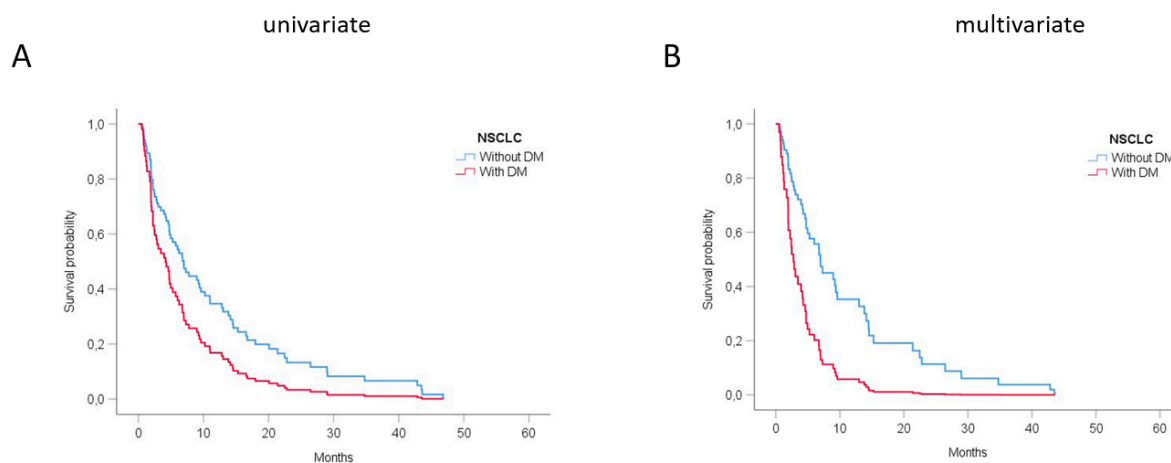

**Supplement Table S1.** Uni- and multivariate survival analysis (Cox-Regression) of prognostic factors in NSCLC patients

|                   |      | Univariate analysis |         | Multivariate analysis |         |
|-------------------|------|---------------------|---------|-----------------------|---------|
|                   |      | HR (95% CI)         | p-value | HR (95% CI)           | p-value |
| Diabetes mellitus | No   | Ref                 |         | Ref                   |         |
|                   | Yes  | 1.68 (0.97 – 2.93)  | 0.066   | 2.73 (1.32 – 5.63)    | 0.006   |
| Age               | <70  | Ref                 |         | Ref                   |         |
|                   | ≥ 70 | 1.539 (0.85 – 2.72) | 0.151   | 1.31 (0.63 – 2.73)    | 0.475   |
| KPS               | ≥ 70 | Ref                 |         | Ref                   |         |
|                   | <70  | 2.47 (1.40 – 4.38)  | 0.002   | 2.85 (1.52 – 5.33)    | 0.001   |
| No. of BM         | ≤ 3  | Ref                 |         | Ref                   |         |
|                   | >3   | 1.26 (0.77 – 2.04)  | 0.355   | 1.18 (0.67 – 2.10)    | 0.565   |

**Supplement Figure S2.** Uni- and multivariate cox regression analysis of survival of patients with (red)/without (blue) DM in patients with melanoma

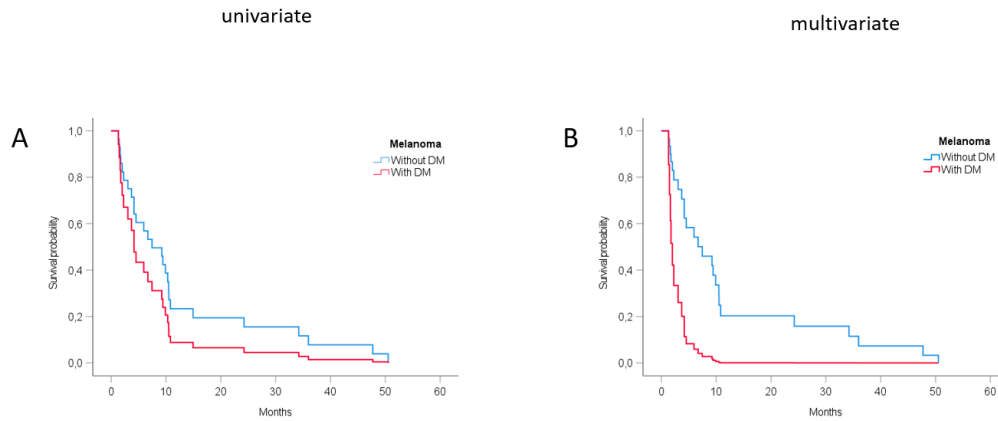

**Supplement Table S2.** Uni- and multivariate (Cox-Regression) of prognostic factors in melanoma patients

|                   |      | Univariate analysis |         | Multivariate analysis |         |
|-------------------|------|---------------------|---------|-----------------------|---------|
|                   |      | HR (95% CI)         | p-value | HR (95% CI)           | p-value |
| Diabetes mellitus | No   | Ref                 |         | Ref                   |         |
|                   | Yes  | 1.66 (0.38 – 7.27)  | 0.498   | 4.62 (0.49 – 44.04)   | 0.183   |
| Age               | <70  | Ref                 |         | Ref                   |         |
|                   | ≥ 70 | 1.07(0.45 - 2.6)    | 0.875   | 0.98 (0.35 – 2.73)    | 0.966   |
| KPS               | ≥ 70 | Ref                 |         | Ref                   |         |
|                   | <70  | 1.47 (0.6 – 3.61)   | 0.405   | 1.46 (0.55 – 3.93)    | 0.448   |
| No. of BM         | ≤ 3  | Ref                 |         | Ref                   |         |
|                   | >3   | 1.27 (0.57 – 2.84)  | 0.555   | 1.18 (0.49– 2.81)     | 0.717   |
